# Supplementary material
Source: MDPI journal article supplement (https://www.mdpi.com/2073-4433/12/11/1382)
Supplement: s1 [file s1]

## Supplementary Materials:

# Spatial-Temporal Changes of Methane Content in the Atmosphere for Selected Countries and Regions with High Methane Emission from Rice Cultivation

Katarzyna Kozicka, Dariusz Gozdowski and Elżbieta Wójcik-Gront \*

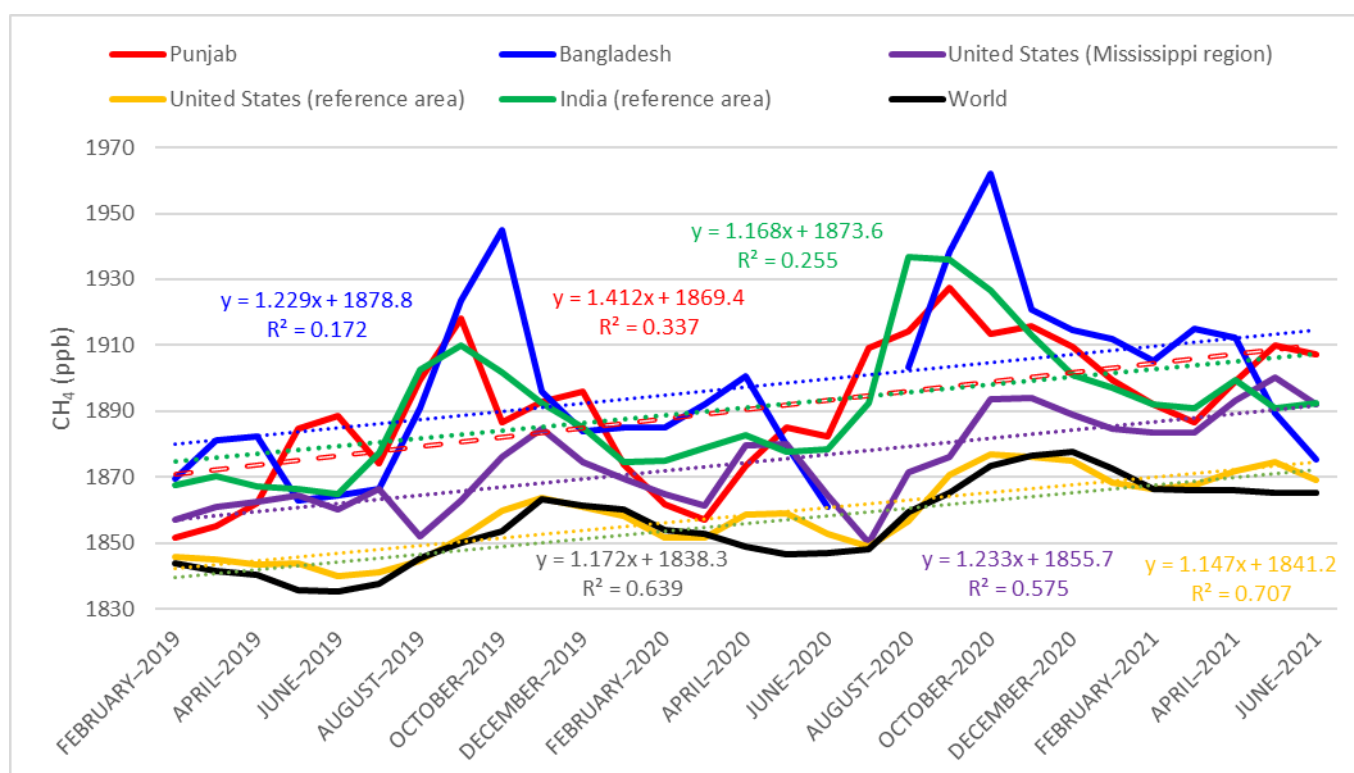

**Figure S1.** Temporal changes in selected countries/regions and total world (limited to latitudes between 60°S and 60°N) of CH<sub>4</sub> content based on Sentinel-5P data (in ppb) and regression equations presenting relationships between CH<sub>4</sub> content (y) and subsequent 1-month periods (x).

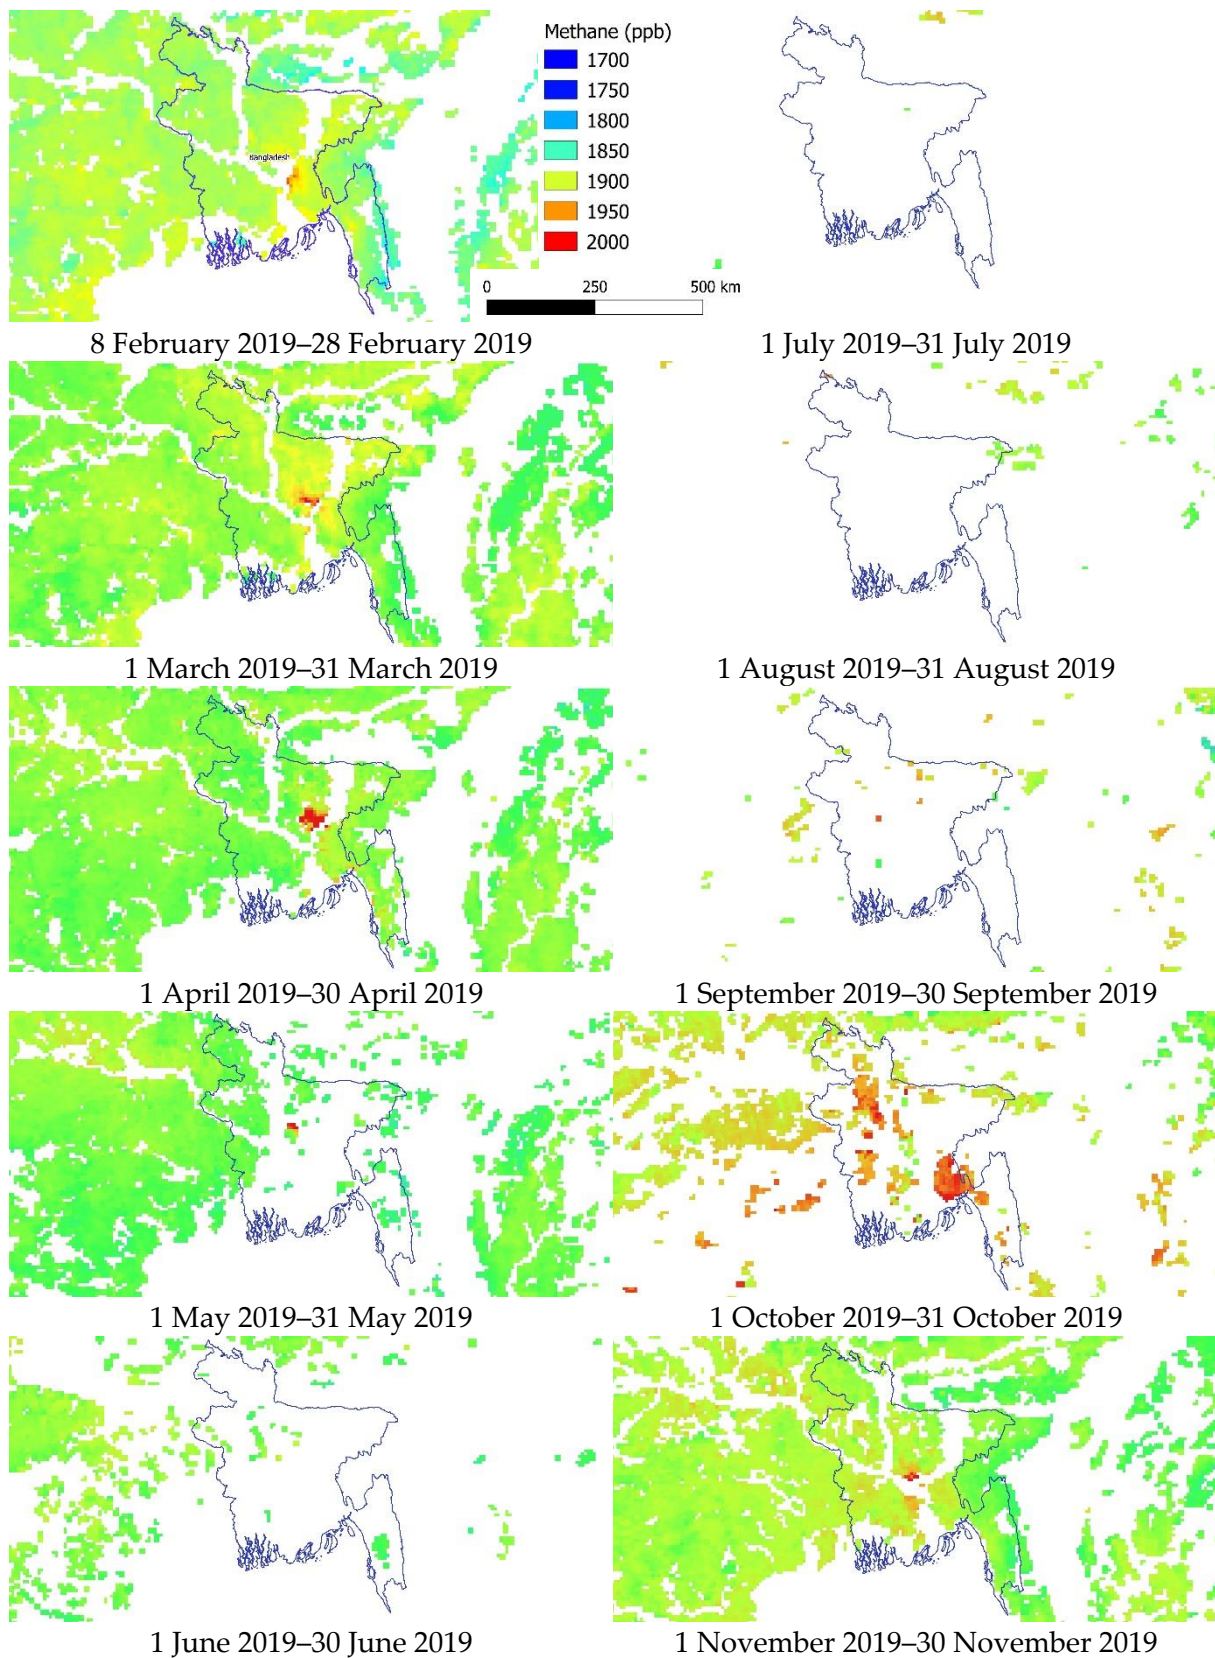

**Figure S2.** CH<sub>4</sub> content in Bangladesh in subsequent 1-month periods.



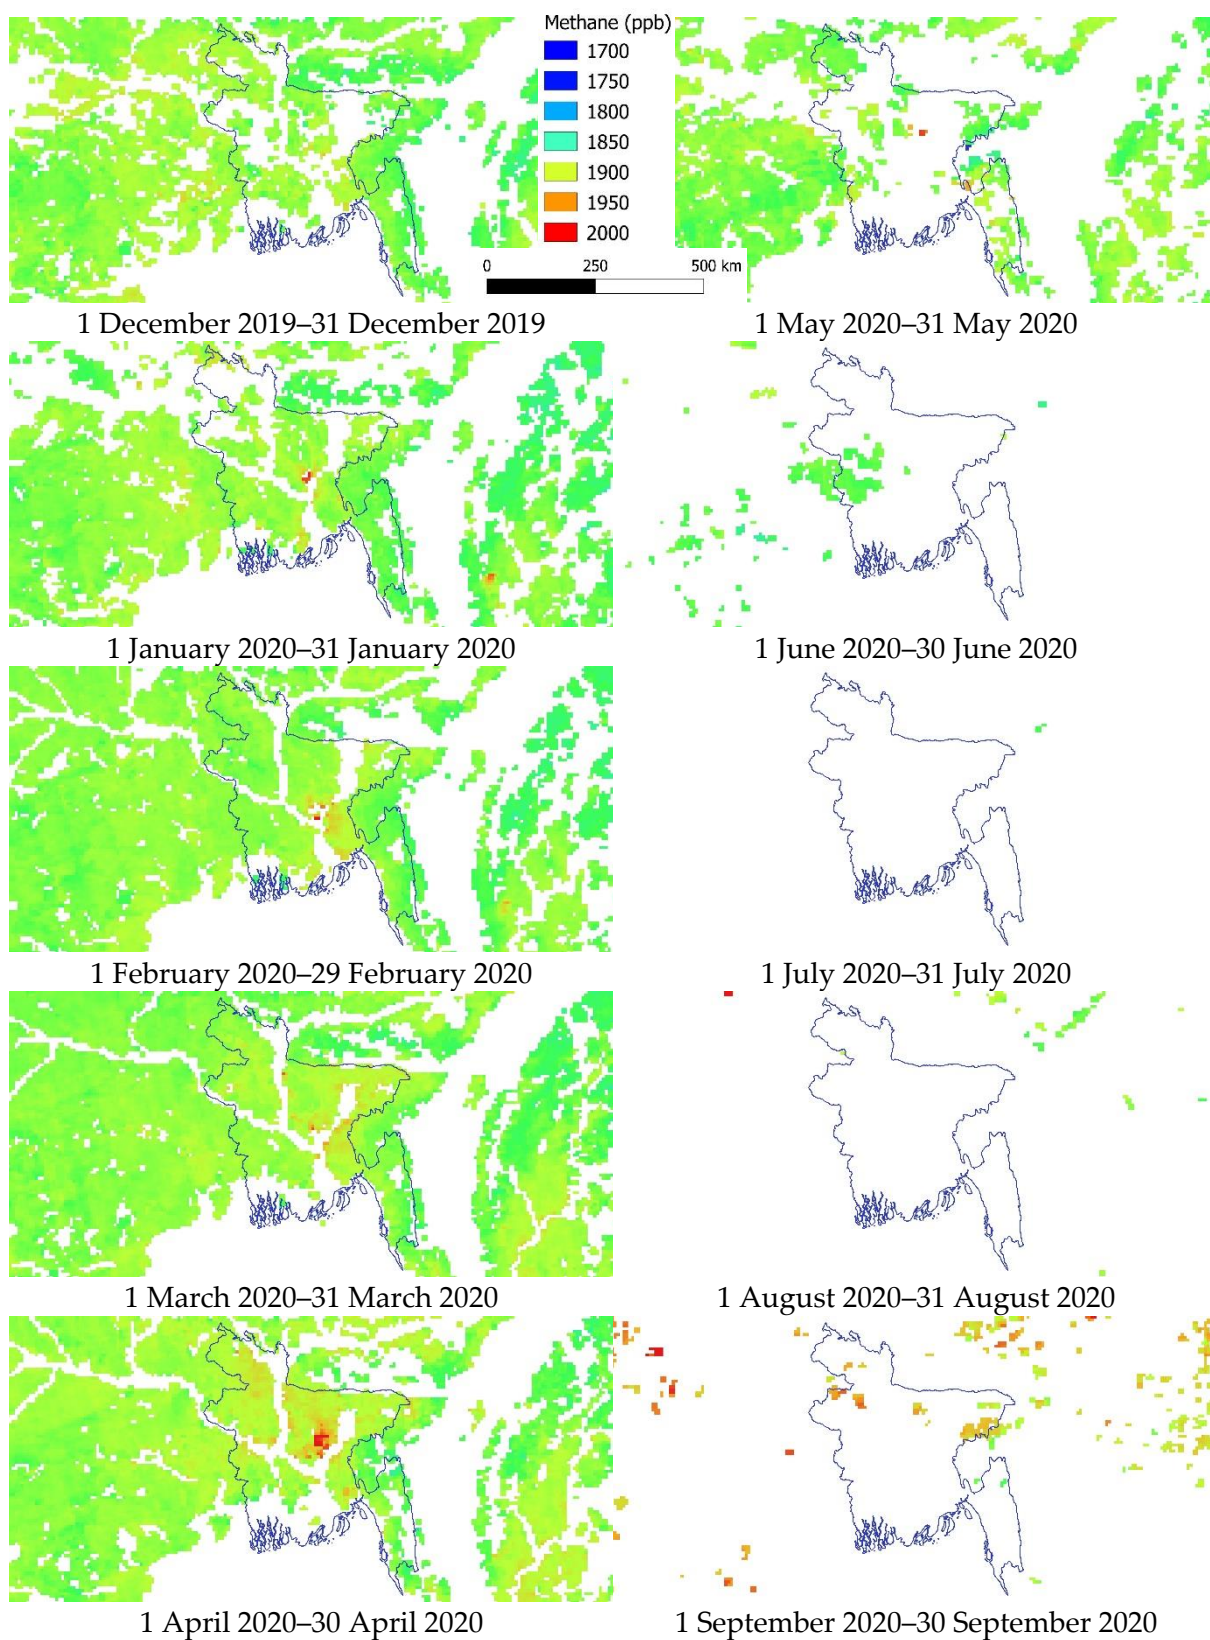

**Figure S2.** CH<sub>4</sub> content in Bangladesh in subsequent 1-month periods. (continued)

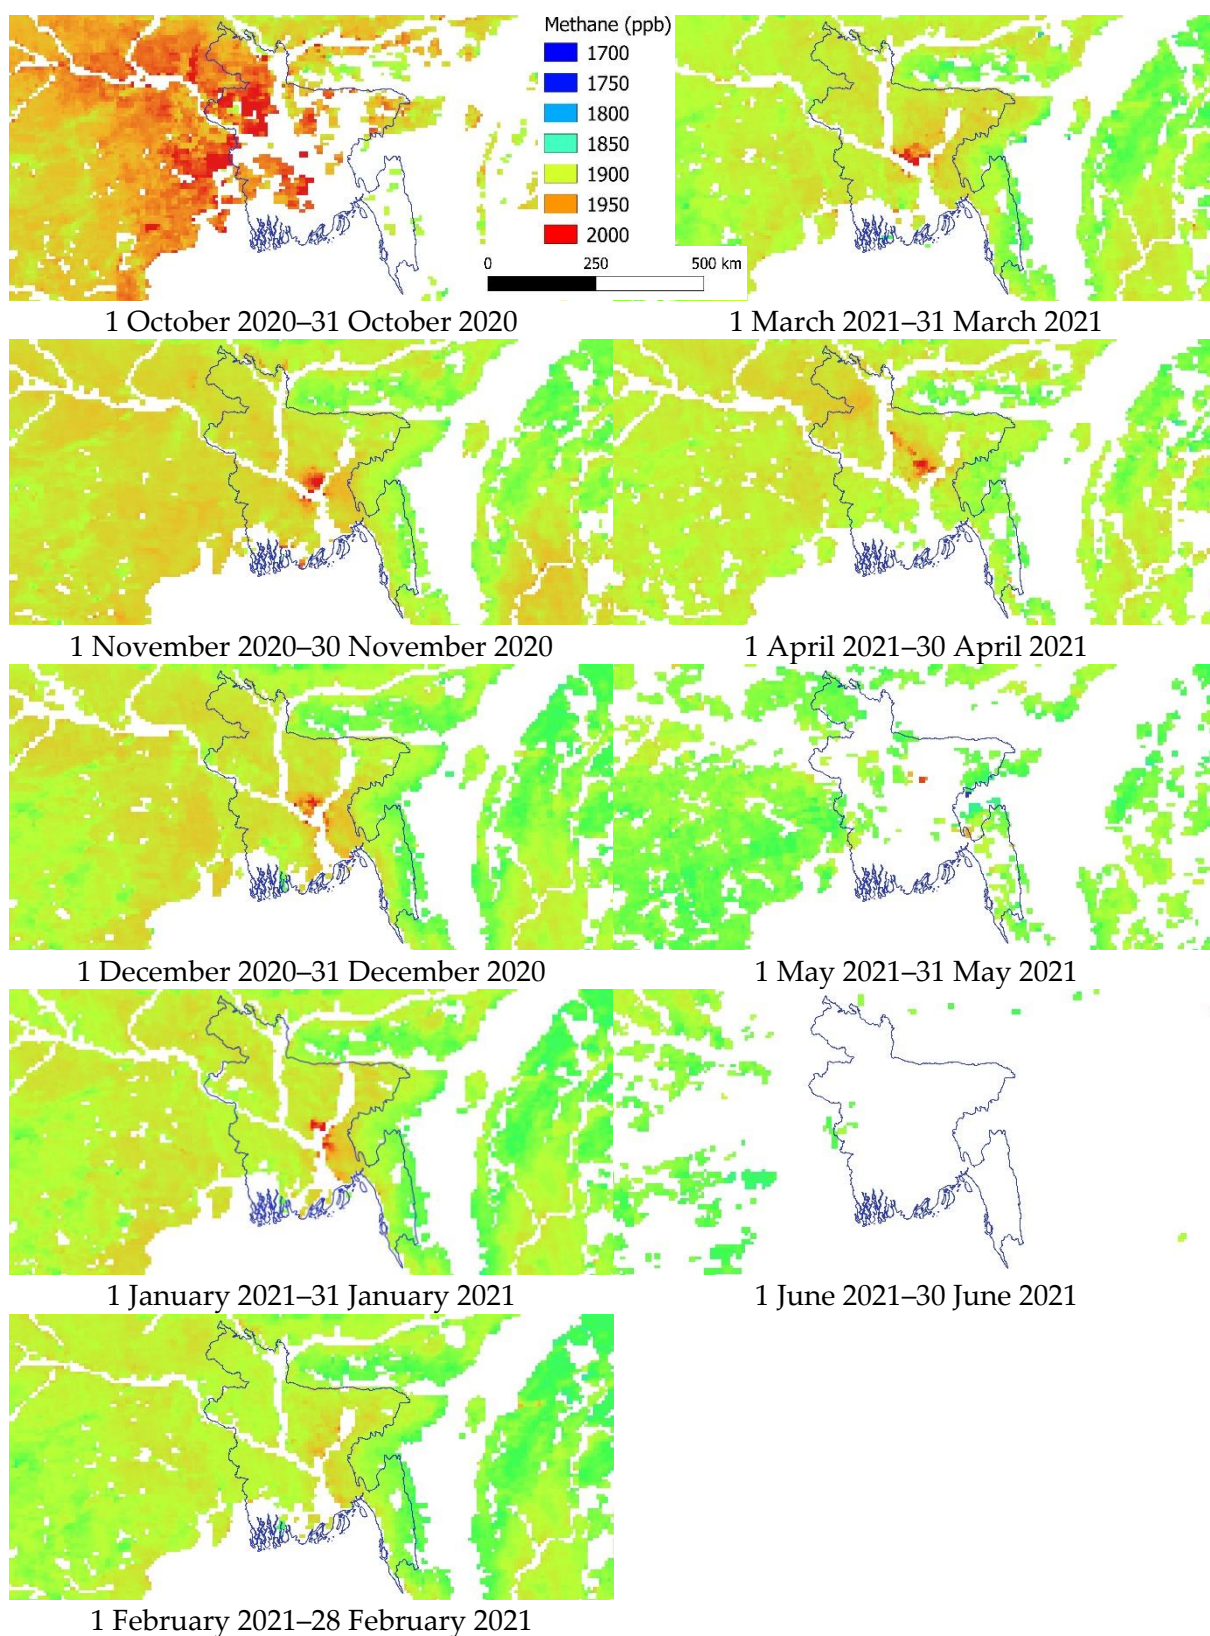

**Figure S2.** CH<sub>4</sub> content in Bangladesh in subsequent 1-month periods. (continued)



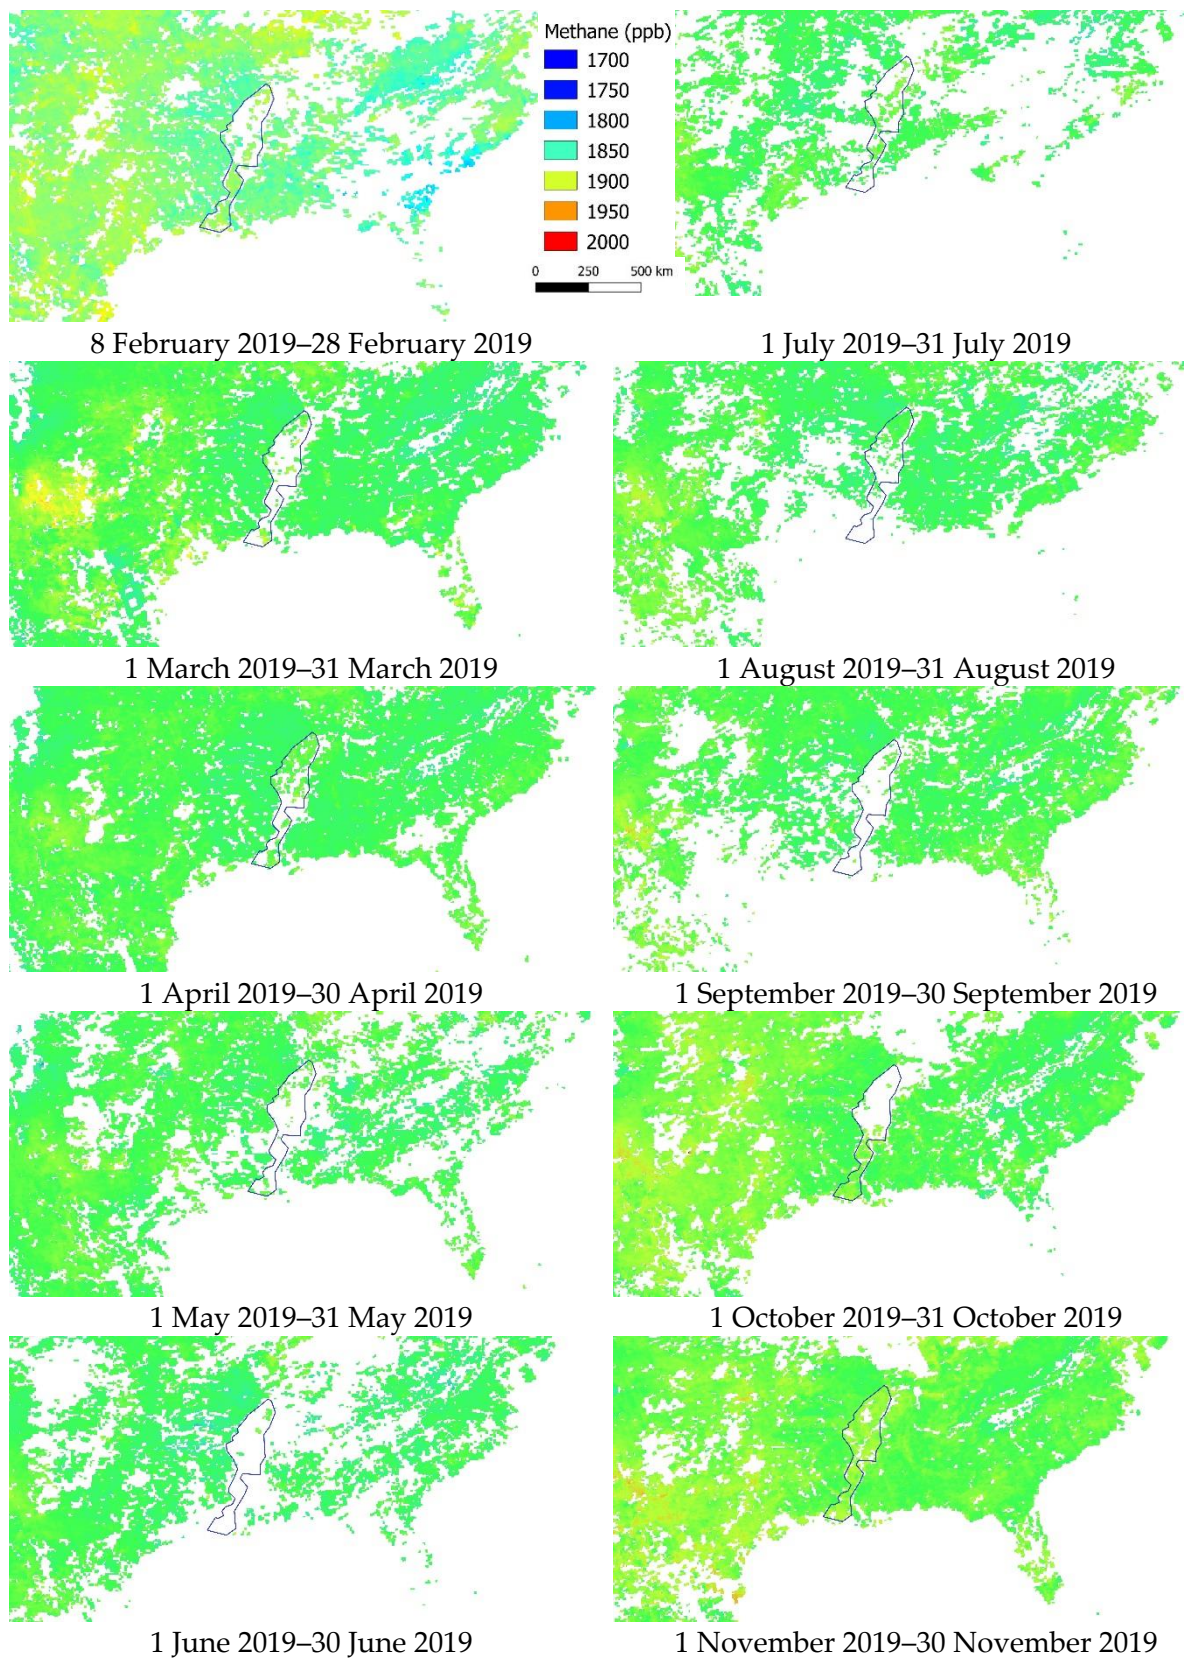

**Figure S3.** CH<sub>4</sub> content in Mississippi valley (United States) in subsequent 1-month periods.



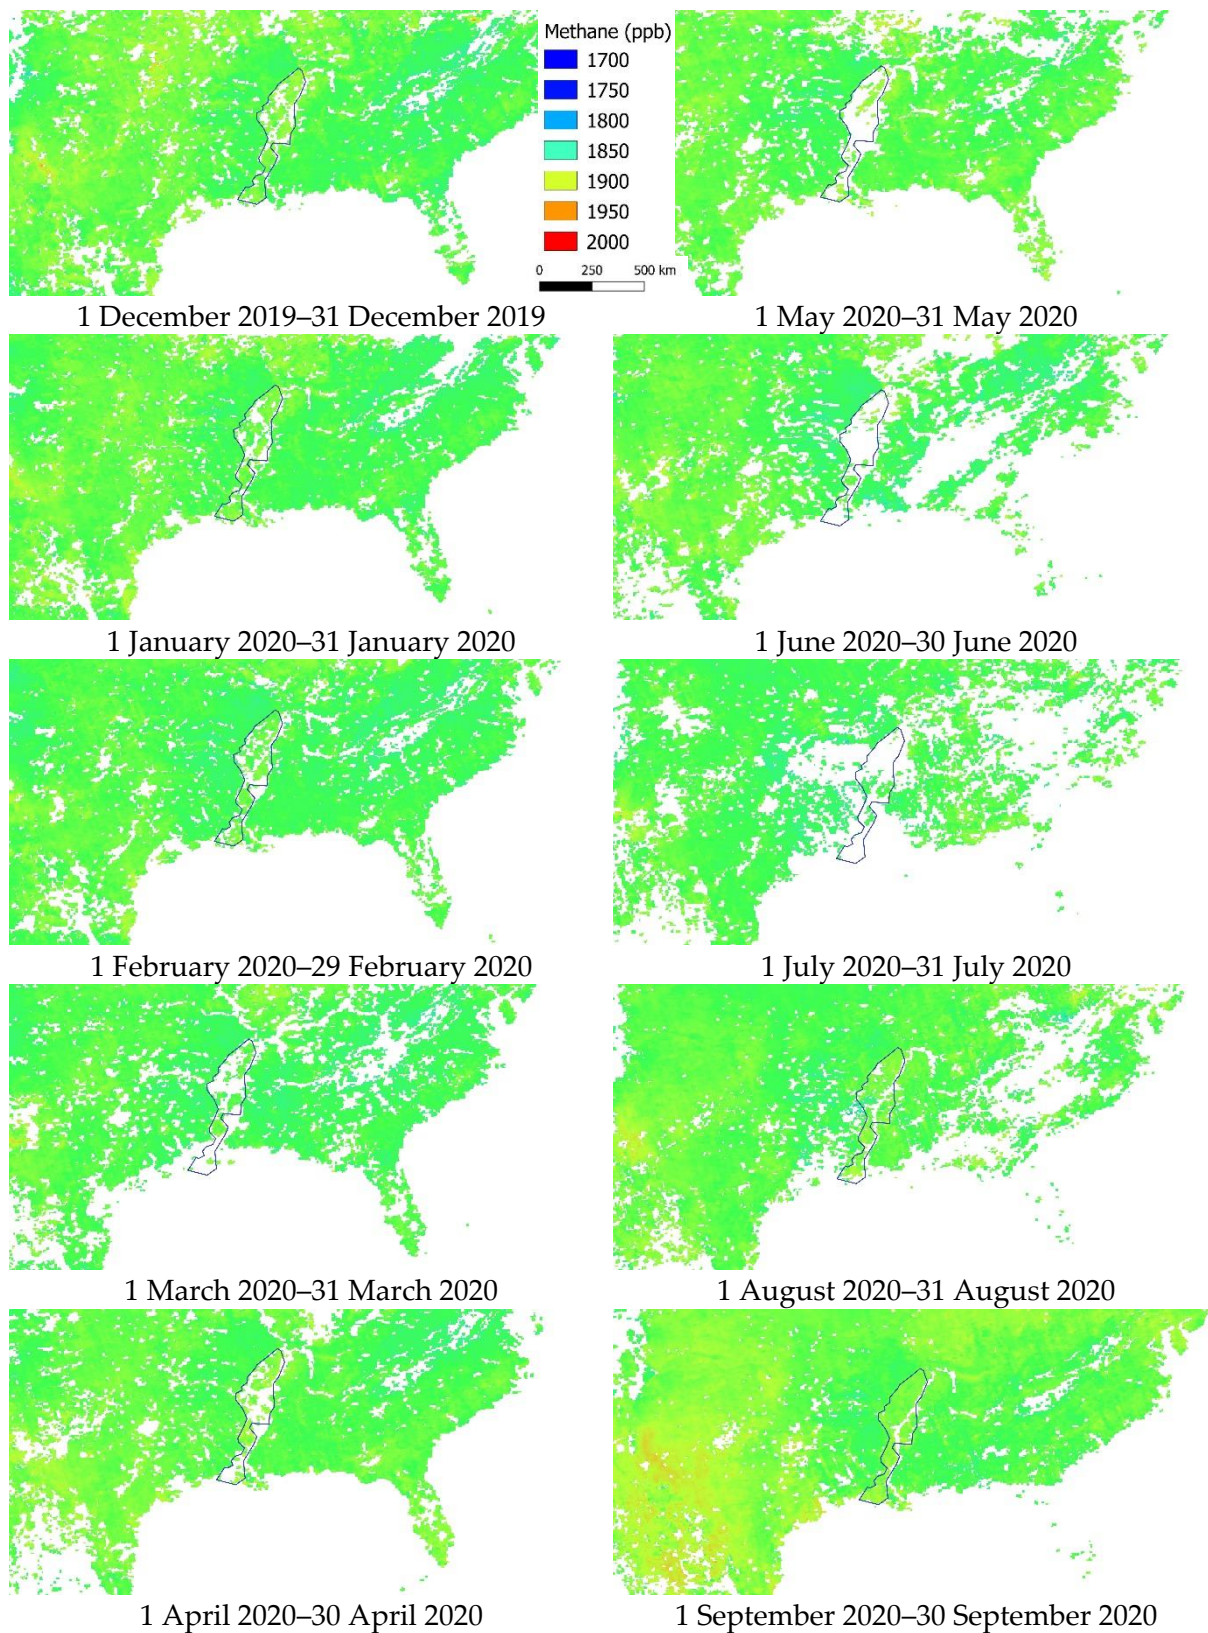

**Figure S3.** CH<sub>4</sub> content in Mississippi valley (United States) in subsequent 1-month periods. (continued)

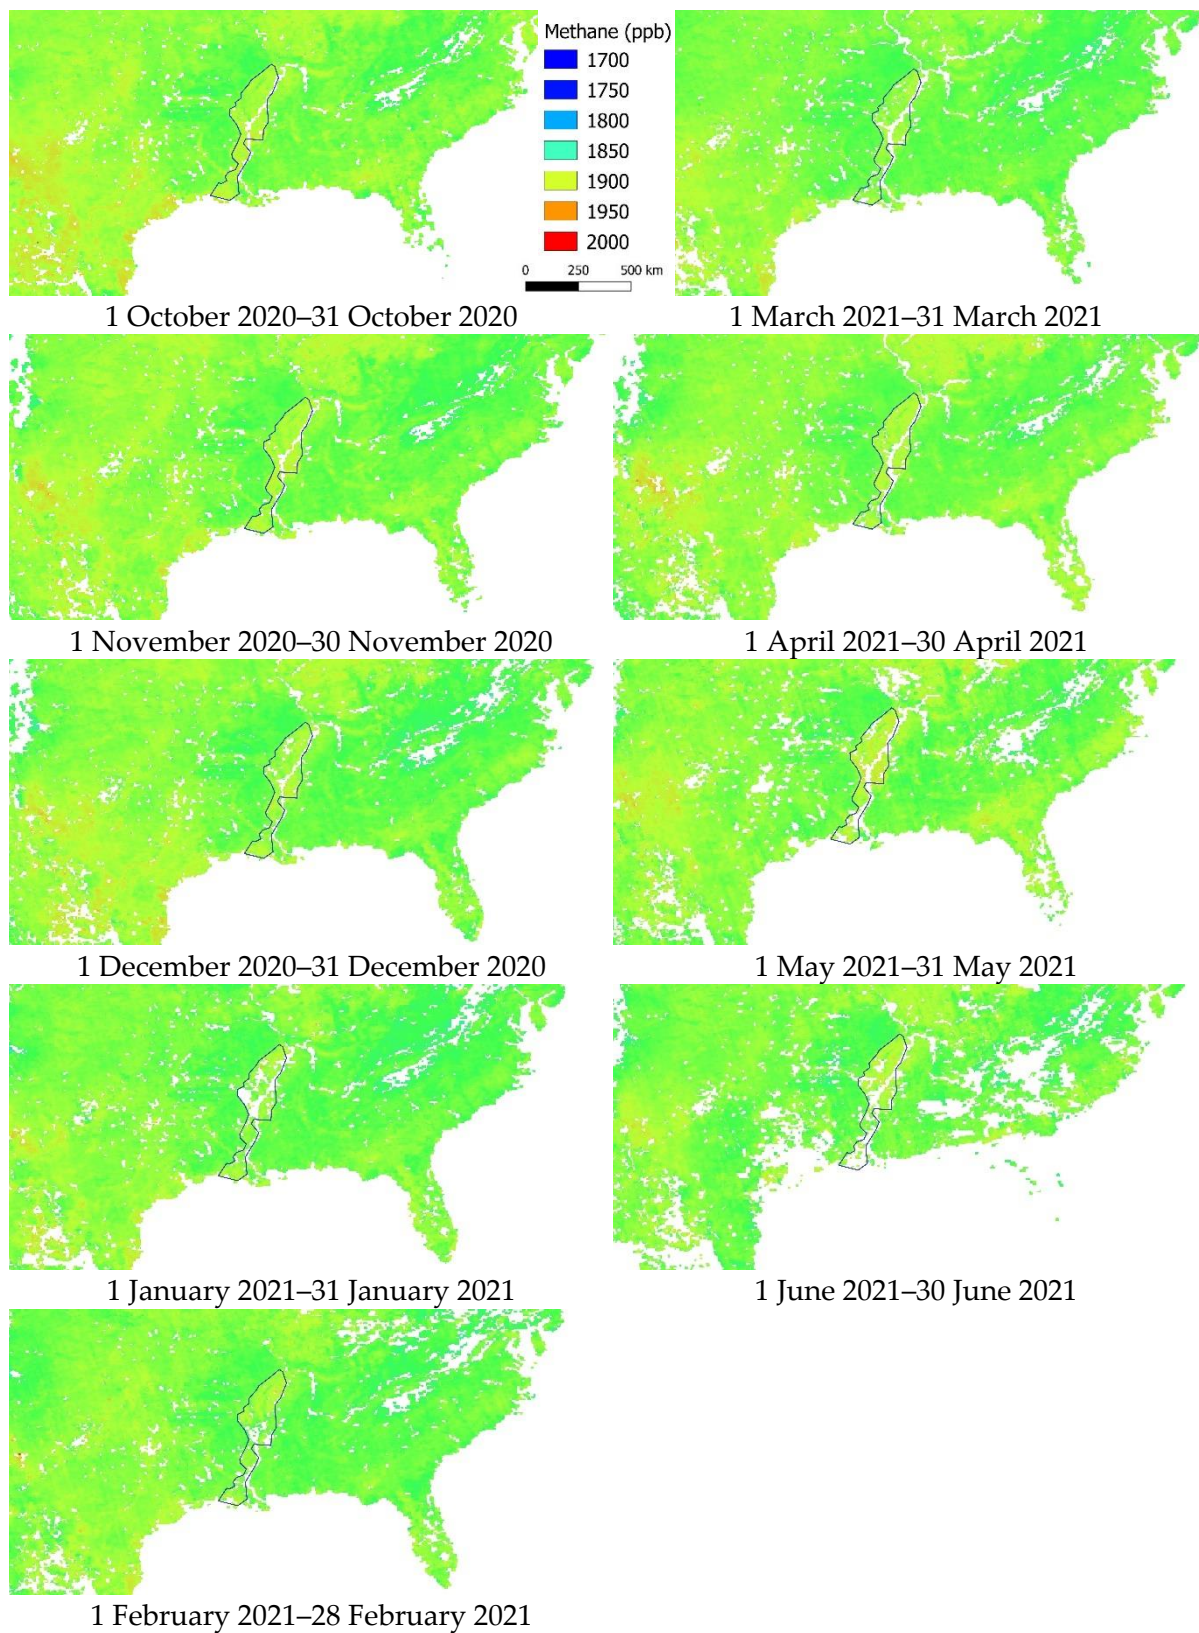

**Figure S3.** CH<sub>4</sub> content in Mississippi valley (United States) in subsequent 1-month periods. (continued)



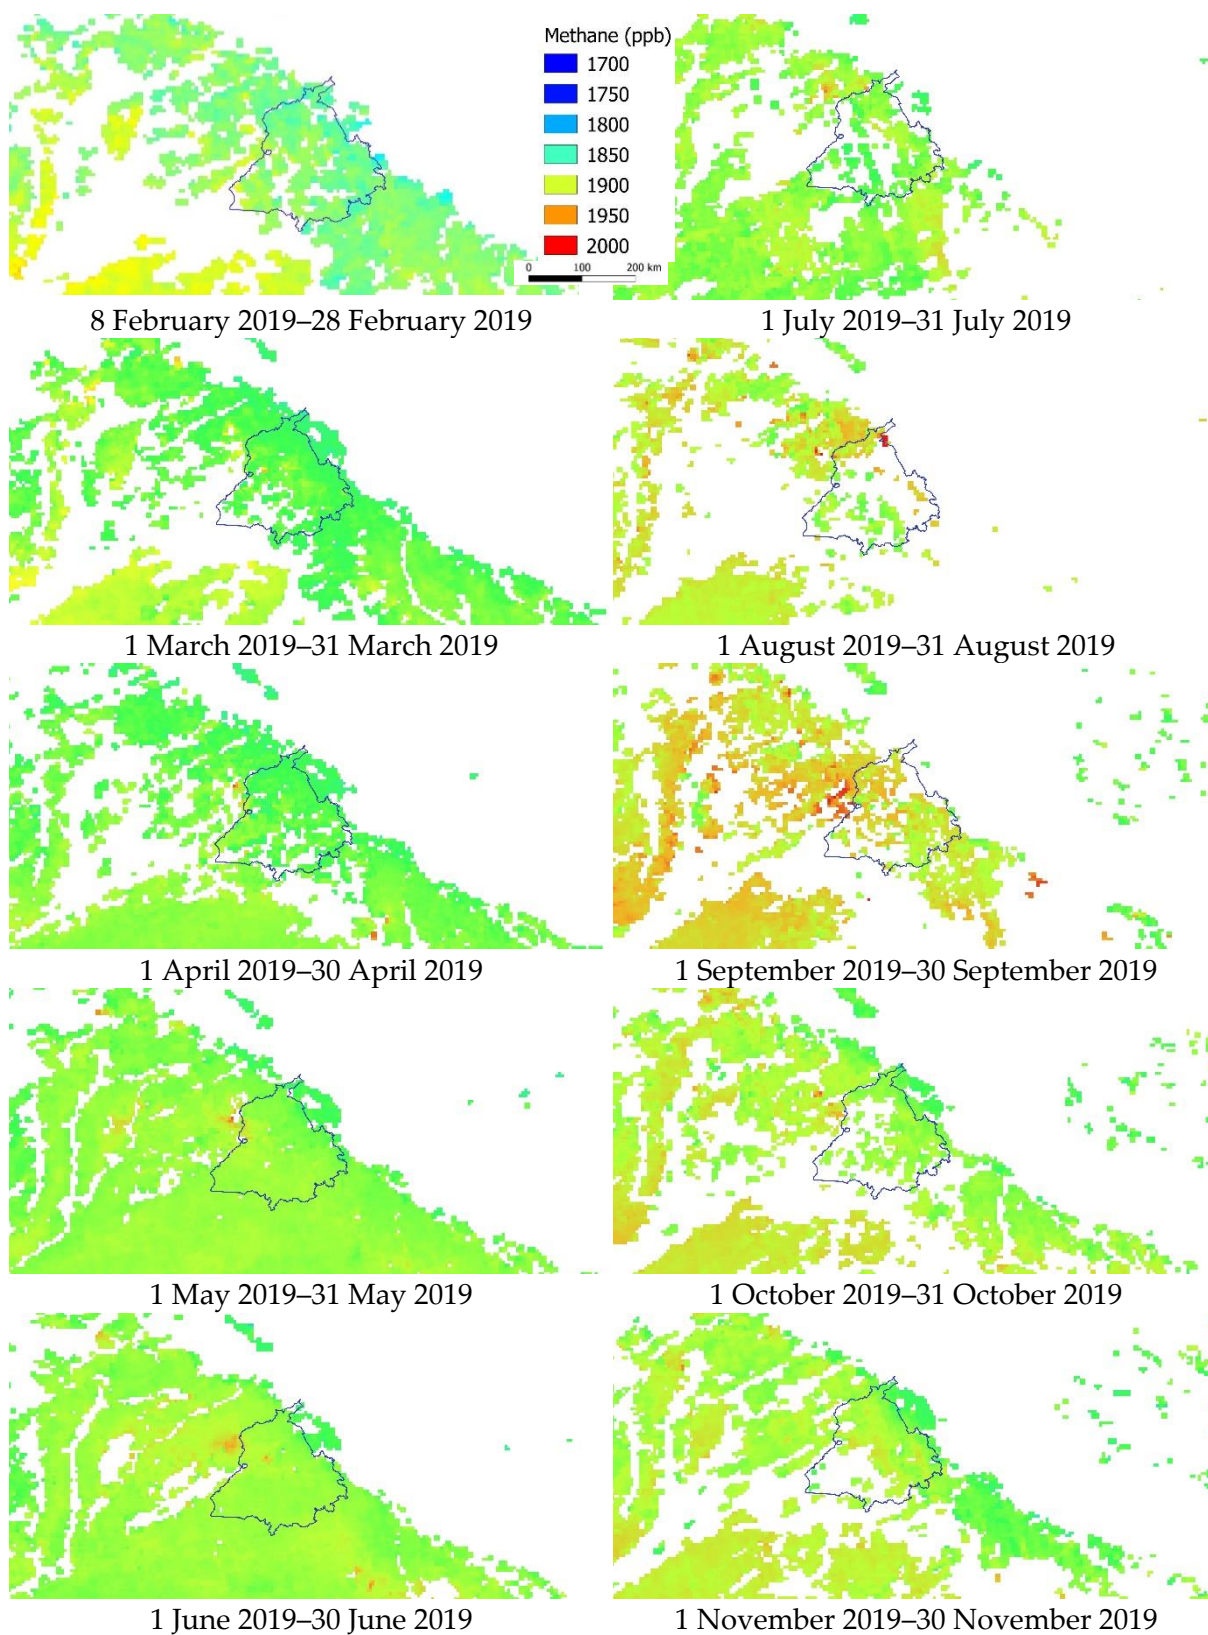

**Figure S4.** CH<sub>4</sub> content in Punjab state (India) in subsequent 1-month periods.



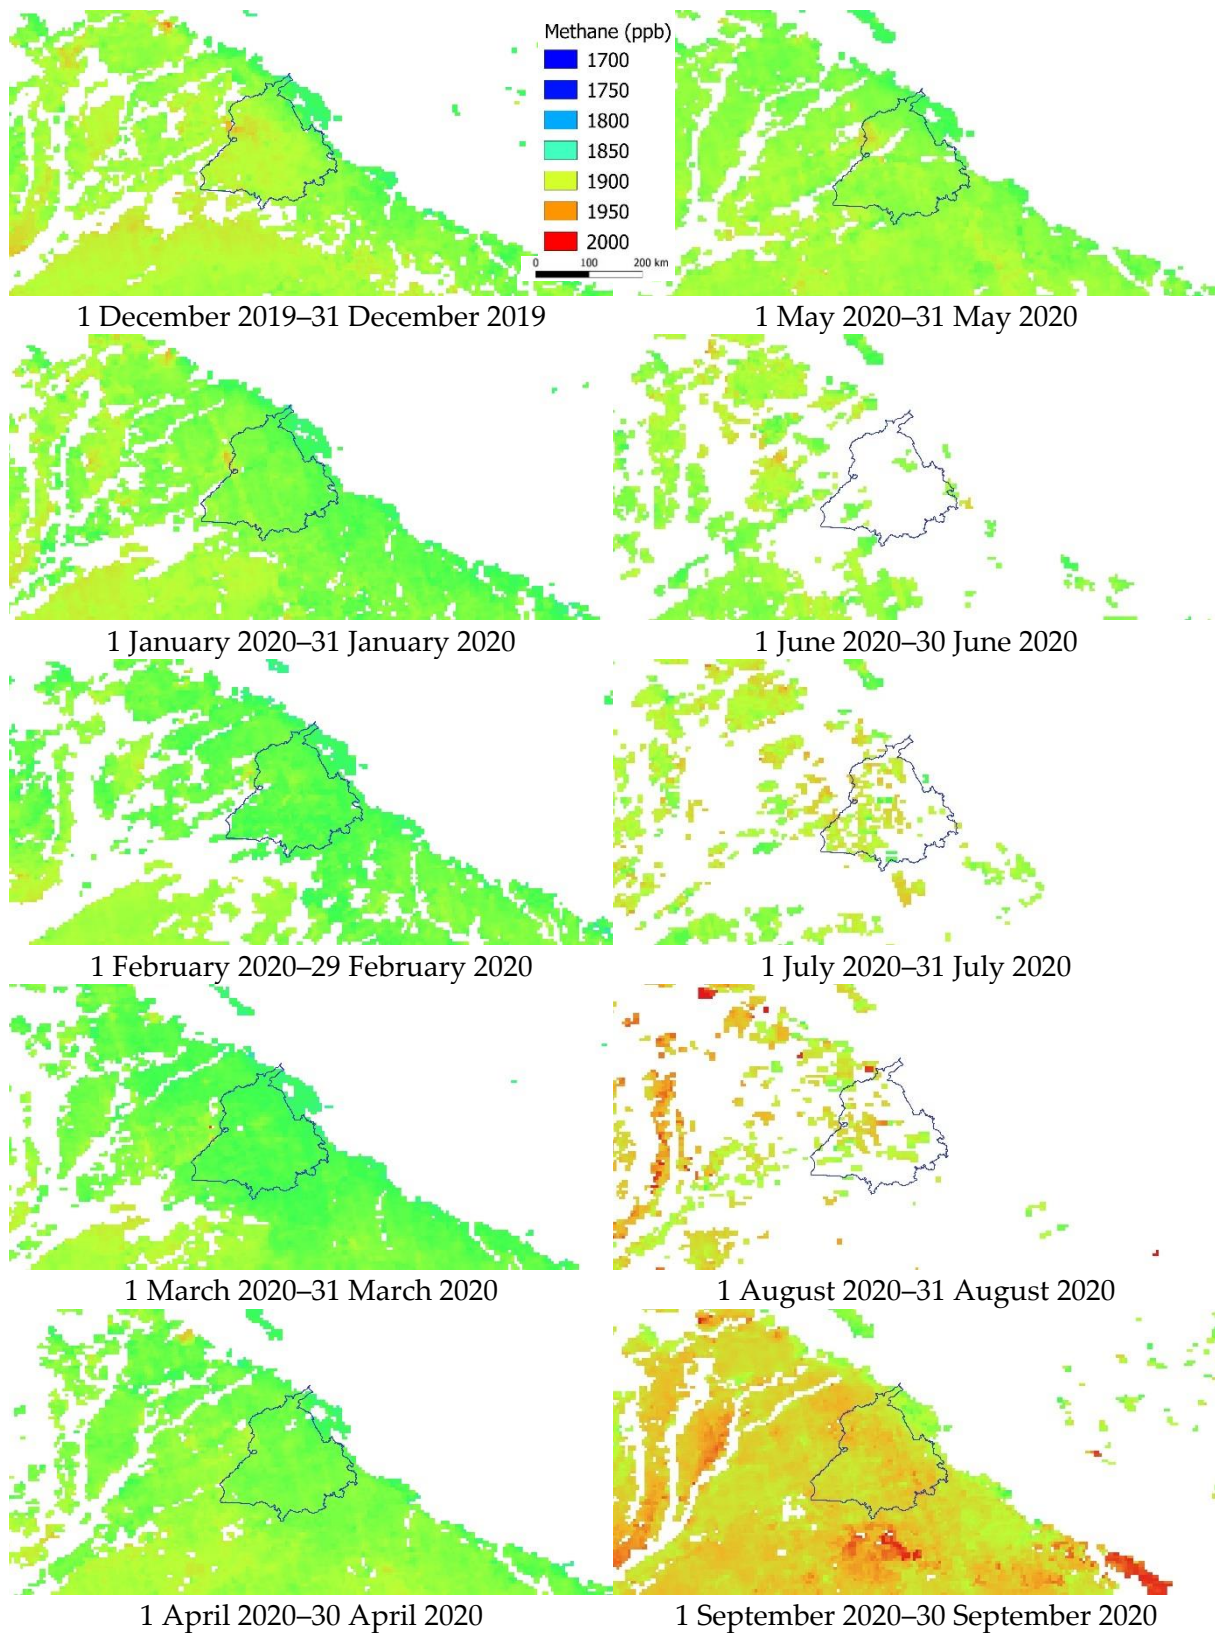

**Figure S4.** CH<sub>4</sub> content in Punjab state (India) in subsequent 1-month periods.(continued)

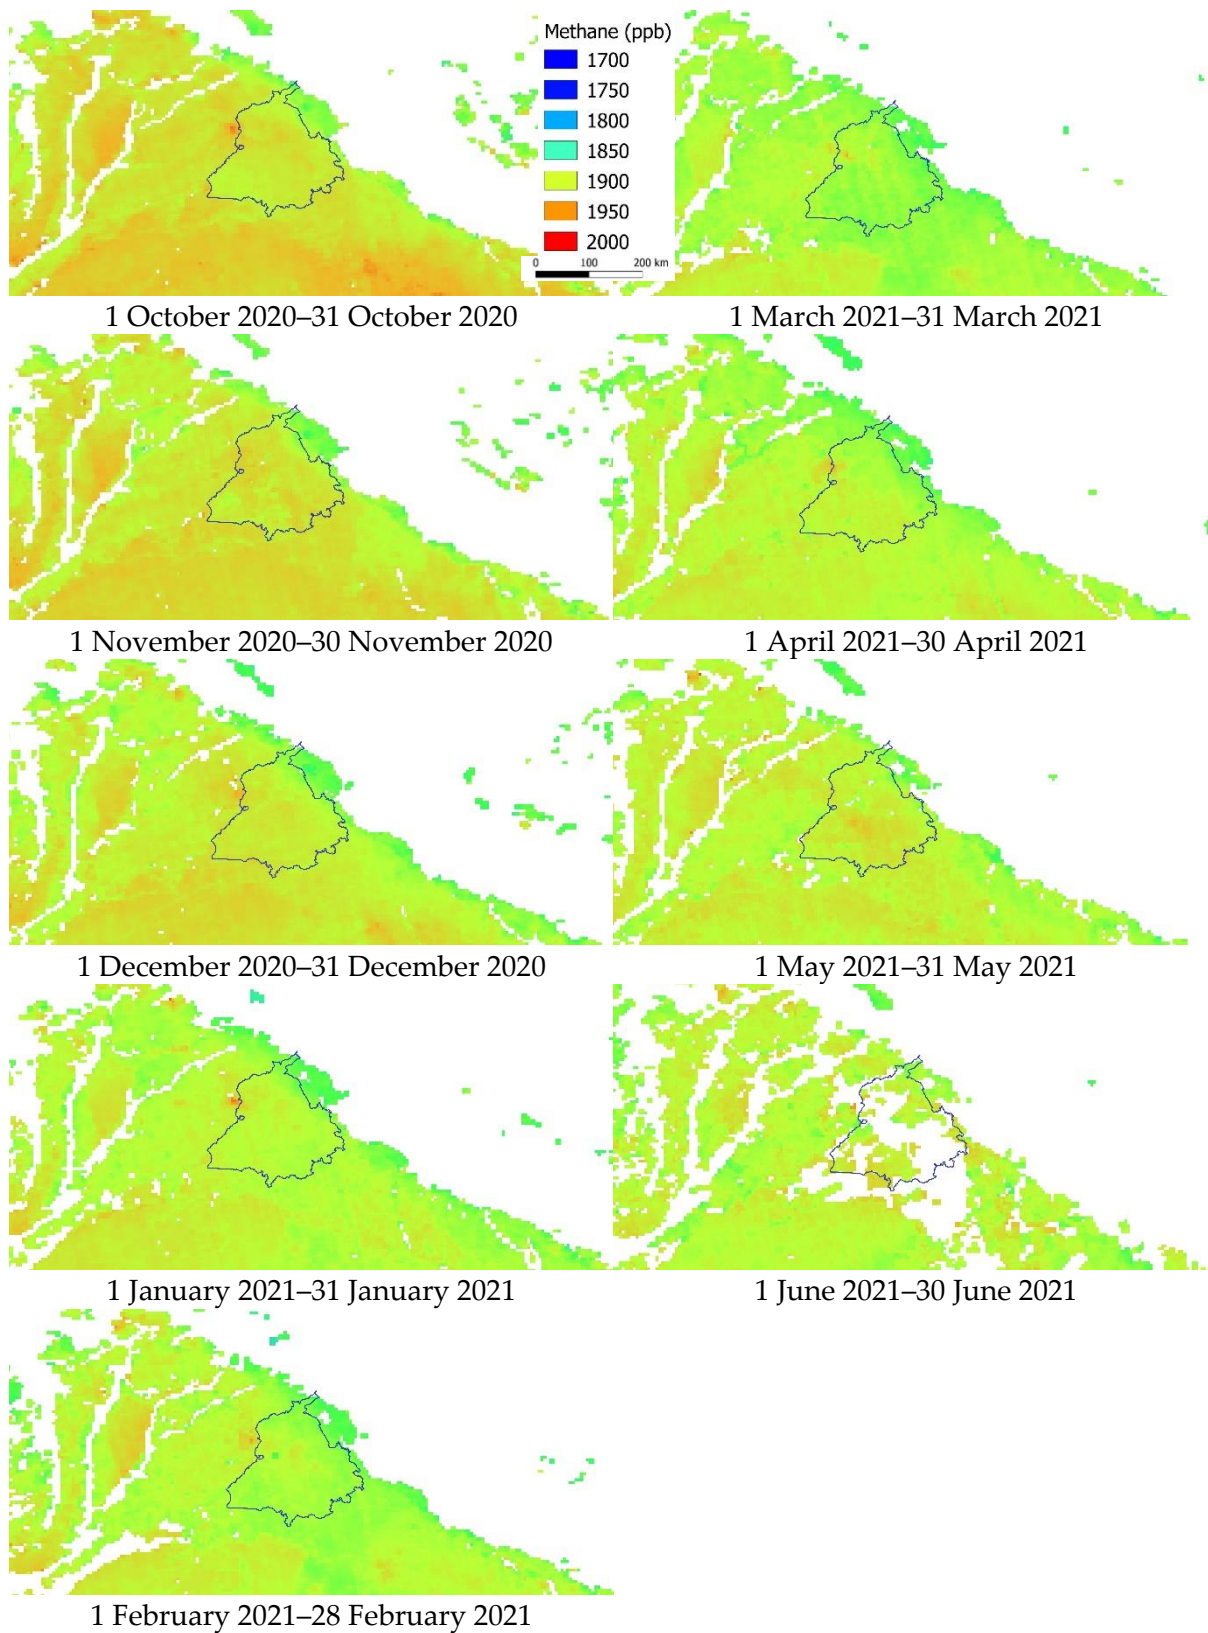

**Figure S4.** CH<sub>4</sub> content in Punjab state (India) in subsequent 1-month periods. (continued)
